# Supplementary material for: Stoichiometric control of live cell mixing to enable fluidically-encoded co-culture models in perfused microbioreactor arrays
Source: Royal Society of Chemistry journal article supplement (doi:10.1039/c5ib00311c), 2016-01-01
Supplement: c5ib00311c1.pdf [file c5ib00311c1.pdf]

## Stoichiometric control of live cell mixing to enable fluidically-encoded co-culture models in perfused microbioreactor arrays

Occhetta P<sup>a,b</sup>, Glass N<sup>a</sup>, Otte E<sup>a,d</sup>, Rasponi M<sup>b</sup>, Cooper-White J<sup>a,c,d,\*</sup>

<sup>1</sup>*Australian Institute of Bioengineering and Nanotechnology, The University of Queensland, Brisbane, QLD, Australia*

<sup>2</sup>*Department of Electronics, Information and Bioengineering, Politecnico di Milano, Milano, Italy*

<sup>3</sup>*School of Chemical Engineering, The University of Queensland, Australia 4072*

<sup>4</sup>*Biomedical Manufacturing, Manufacturing Flagship, CSIRO, Clayton, Victoria, Australia, 3169*

\* - corresponding author (j.cooperwhite@uq.edu.au)

### Supplementary information

#### Preliminary validation device layout

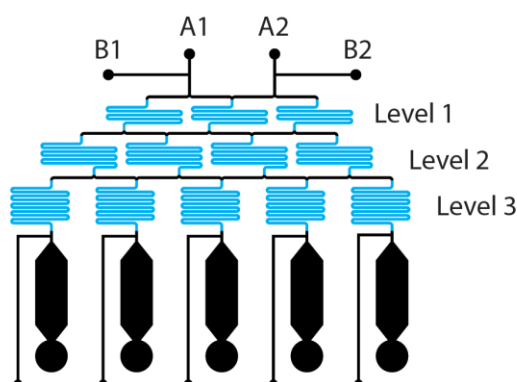

**Fig S11** An *ad hoc* device layout was conceived for preliminary mixing validations, consisting of (i) a three level serial dilution generator integrated with herringbone units for chaotic mixing (blue features) and (ii) a culture area comprising five parallel units. Dilutions of cells were generated from two main inlets (A1-A2) and delivered to downstream culture units. Each culture unit consisted of a rectangular culture chamber (w3000 x l6000 x h100  $\mu\text{m}$ ) and was combined with a lateral seeding channel.

(a) hMSC/SAOS2 reverse gradient

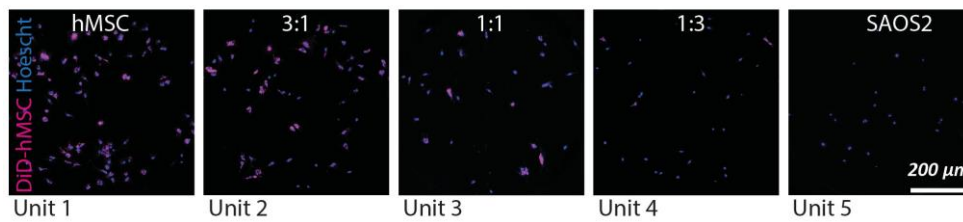

(b) SAOS2 low concentration gradient

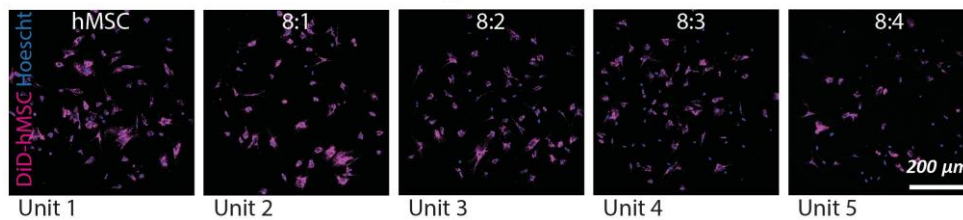

**Fig. SI2** Establishment of programmed hMSCs-SAOS2 osteogenic co-culture models within the microfluidic platform. Two different models were generated: a reverse gradient of hMSCs-SAOS2 (a) and a low concentration gradient of SAOS2 on a preseeded monolayer of hMSCs (b). The achievement of predicted mixing ratios is qualitatively visualized by DiD-staining of hMSC.

## Alkaline phosphatase activity

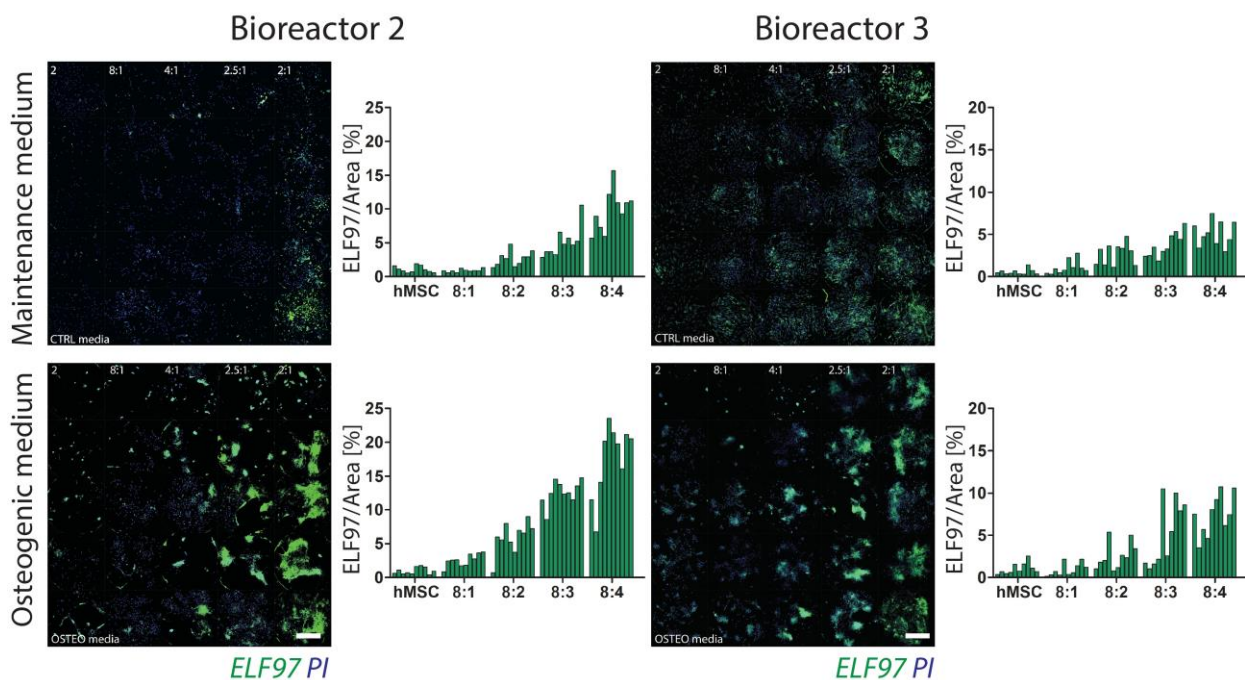

**Fig. SI3** hMSCs-SAOS2 perfusion co-culture model: impact of SAOS2 concentration on alkaline phosphatase expression and cell proliferation. Fluorescence images showing ELF97 expressions for each considered hMSCs/SAOS2 co-culture ratios (8:0, 8:1, 8:2, 8:3 and 8:4), after 7 days under either maintenance or osteogenic medium slow perfusion (2 μl/hr each column). Shown results correspond to two technical repeats of the experiments and five representative chambers are shown for each bioreactor unit (scale bar=1mm).

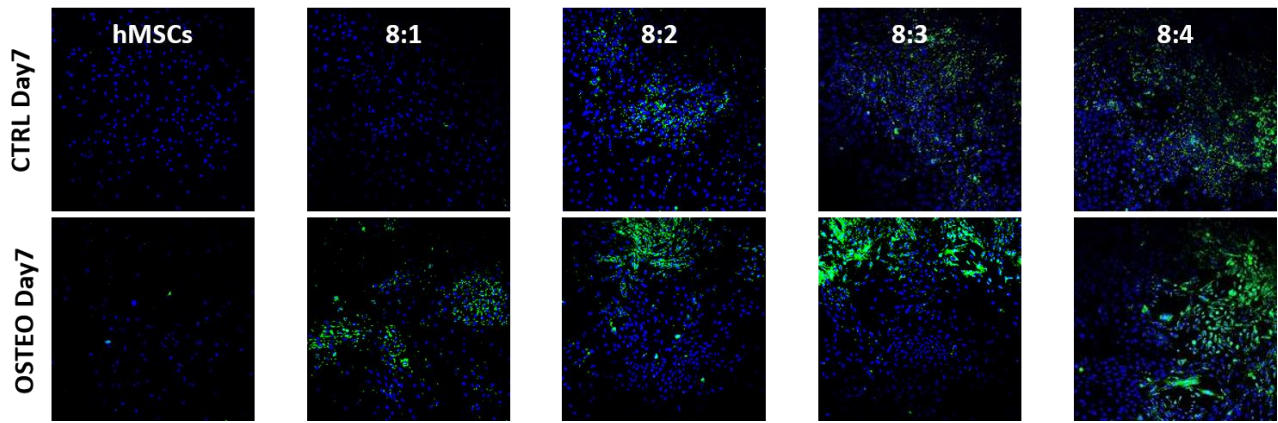

**Fig. SI4** hMSCs-SAOS2 static co-culture controls: impact of SAOS2 concentration on alkaline phosphatase expression under macroscale static culture conditions.
